# Supplementary material for: Requirement of the MAP kinase signaling pathways for mouse preimplantation development
Source: Oxford University Press journal article supplement (doi:10.1242/dev.01729), 2005-03-17
Supplement: dev01729-sup-tables1.pdf [file dev01729-sup-tables1.pdf]

## Supplemental Table S1. Array data for 156 transcripts (161 probe sets)

All probe sets on the arrays were scaled to a target intensity of 500 (GeneChip Operating Software 1.0).

### group 1

| Probe Set    | Common name | wt 1 | wt 2  | wt 3  | SB 1  | SB 2  | SB 3  | SP 1 | SP 2  | SP 3  | U 1  | U 2   | U 3   |
|--------------|-------------|------|-------|-------|-------|-------|-------|------|-------|-------|------|-------|-------|
| 1437502_x_at | Cd24a       | 74.4 | 123.7 | 158.3 | 125.2 | 437.8 | 698.2 | 58.9 | 426.7 | 410.2 | 78.9 | 140.3 | 185.1 |
| 1442362_at   |             | 1025 | 149.7 | 204.2 | 2293  | 670   | 683.4 | 3138 | 310.1 | 451.5 | 1132 | 280.9 | 155.1 |

### group 2

| Probe Set    | Common name   | wt 1  | wt 2  | wt 3  | SB 1  | SB 2  | SB 3  | SP 1  | SP 2  | SP 3  | U 1   | U 2   | U 3   |
|--------------|---------------|-------|-------|-------|-------|-------|-------|-------|-------|-------|-------|-------|-------|
| 1429169_at   | 2600016C11Rik | 746.2 | 263.3 | 389.5 | 1991  | 813.5 | 282.5 | 1339  | 663.7 | 281.3 | 837.1 | 625.7 | 208.6 |
| 1425658_at   | 9930012E15Rik | 6.9   | 49    | 69.8  | 79.3  | 97.3  | 153.1 | 12.1  | 62.6  | 85.5  | 22.4  | 34.4  | 59.1  |
| 1459701_x_at |               | 46.7  | 19.4  | 28.4  | 44.7  | 86.8  | 70.9  | 24.4  | 27.7  | 24.8  | 38.4  | 33.1  | 8.9   |
| 1439165_at   |               | 139.7 | 170.5 | 99.5  | 124.8 | 336.9 | 207.8 | 1028  | 173.9 | 171.5 | 213.6 | 71.1  | 66.4  |
| 1441482_at   | Map2k6        | 327.8 | 343   | 222.3 | 558.2 | 675   | 466.4 | 273.6 | 367.8 | 279.3 | 206.6 | 249.9 | 155.8 |
| 1451557_at   | Tat           | 169.3 | 155.1 | 159   | 392   | 436.4 | 367.1 | 435.6 | 195.5 | 264.4 | 176   | 158.1 | 229.6 |
| 1420539_a_at | 1810022C01Rik | 105.1 | 15    | 15.4  | 113.5 | 55.8  | 82.6  | 120   | 59.3  | 65.5  | 132.8 | 56.5  | 102   |
| 1458089_at   |               | 161.4 | 7.5   | 29.4  | 222   | 59.4  | 88.1  | 108   | 34.5  | 9     | 256.9 | 50    | 40.6  |
| 1445952_at   |               | 415   | 5.3   | 22.6  | 125.5 | 117.3 | 105.7 | 214.5 | 51.7  | 99.1  | 375.5 | 5.1   | 53.7  |
| 1441370_at   | 3632431M01Rik | 539.5 | 3.6   | 7.8   | 262   | 96.3  | 78    | 319.9 | 53.9  | 20.6  | 235.5 | 46    | 10.1  |
| 1444038_at   |               | 874.1 | 205.3 | 141.4 | 2045  | 562   | 290.6 | 973.9 | 170.7 | 250.9 | 575.2 | 250.9 | 307.1 |

### group 3

| Probe Set    | Common name   | wt 1  | wt 2  | wt 3  | SB 1  | SB 2  | SB 3  | SP 1  | SP 2  | SP 3  | U 1   | U 2   | U 3   |
|--------------|---------------|-------|-------|-------|-------|-------|-------|-------|-------|-------|-------|-------|-------|
| 1427170_at   | 2410072D24Rik | 15.1  | 49.7  | 102   | 17.6  | 37.2  | 121.1 | 66.7  | 133.7 | 56.8  | 35.4  | 47.4  | 79.2  |
| 1428896_at   | Pdgfrl        | 142.7 | 97.5  | 172.9 | 354.1 | 155.1 | 94.9  | 786.7 | 228.4 | 276.6 | 320.8 | 5     | 61.5  |
| 1444529_at   | Eif1a         | 178.5 | 140.7 | 43.4  | 247.7 | 53    | 179.3 | 510.4 | 775.5 | 1079  | 128   | 106   | 25.1  |
| 1447227_at   |               | 104.1 | 66.9  | 39.3  | 80    | 100.5 | 3.3   | 260   | 191.2 | 195.6 | 141.7 | 103.5 | 141   |
| 1429378_x_at | Defcr-rs1     | 935   | 182.4 | 297.6 | 1414  | 306   | 263.2 | 1488  | 526.3 | 408.6 | 1051  | 318.8 | 279.4 |
| 1439670_at   | Naalad2       | 430.8 | 200.5 | 358.3 | 345.1 | 122.6 | 199.5 | 1022  | 421   | 384.5 | 243.7 | 137.4 | 230.1 |
| 1451474_a_at | D13Ert275e    | 8.6   | 98.5  | 180.8 | 34.3  | 80.9  | 119.1 | 84.4  | 220.1 | 266   | 26.3  | 102   | 24.6  |
| 1451297_at   | 5730581M22    | 235   | 377.9 | 512.9 | 540   | 477.1 | 497.7 | 531.6 | 826.3 | 707.8 | 146.3 | 323.3 | 274.4 |
| 1457048_at   | Gpr103        | 186.1 | 4.5   | 63.9  | 246.7 | 44.4  | 72.1  | 398.5 | 85.4  | 45.2  | 239.3 | 36.2  | 12    |
| 1427479_at   | Eif1a         | 247.4 | 478   | 133.6 | 164.1 | 466.7 | 616.4 | 1073  | 5263  | 7781  | 237.3 | 476.2 | 245.7 |
| 1443600_at   | AA414992      | 202   | 32.5  | 19    | 90.6  | 4.8   | 56.6  | 512.4 | 92    | 176.2 | 97.9  | 43.3  | 70.7  |
| 1456495_s_at | AI596402      | 81.8  | 156.4 | 133.6 | 63.3  | 163.4 | 118.2 | 182.8 | 273.7 | 364.1 | 89.6  | 108.5 | 177.5 |
| 1453369_a_at | 1500005J14Rik | 307.2 | 503.3 | 351.2 | 303.5 | 547.4 | 386.6 | 505   | 945.4 | 1808  | 257.4 | 384   | 421.7 |
| 1436905_x_at | Laptn5        | 118.3 | 696.9 | 660.5 | 61.2  | 211.8 | 384.1 | 370.4 | 1605  | 1576  | 98.5  | 467.2 | 742.9 |
| 1448573_a_at | Ceacam10      | 328.1 | 1027  | 607.6 | 573.5 | 905.9 | 693.7 | 780.7 | 1799  | 1565  | 500.6 | 1482  | 909.7 |
| 1452218_at   | AU018638      | 84.4  | 360.5 | 292.9 | 138.3 | 418.6 | 340.8 | 193.6 | 587.4 | 692.8 | 173.5 | 252.8 | 259.5 |
| 1438840_x_at | Apoa1         | 166.6 | 518.5 | 190   | 132.3 | 20.5  | 75.1  | 824.9 | 1413  | 825.3 | 118.9 | 409   | 90.5  |
| 1417884_at   | Slc16a6       | 77.4  | 210.6 | 258.6 | 145.6 | 373.6 | 331.3 | 189.5 | 339.6 | 558.5 | 165.5 | 376.5 | 133.2 |
| 1425947_at   | Ifng          | 23.6  | 23.5  | 6.6   | 52.7  | 2.8   | 1.3   | 101   | 98.5  | 522.4 | 29.2  | 39.4  | 10.1  |
| 1459089_at   |               | 302.5 | 12.8  | 5.6   | 100.9 | 13.7  | 43.8  | 1516  | 96.1  | 581.8 | 110.9 | 20.2  | 18    |
| 1423390_at   | Siah1a        | 87.1  | 254.7 | 185.8 | 141.7 | 238.6 | 73.7  | 199.4 | 186.5 | 623.1 | 107.3 | 225.5 | 201.6 |
| 1445849_at   | A430089I19    | 214.4 | 146.1 | 33.1  | 90.2  | 32.7  | 24.5  | 3853  | 1015  | 2612  | 208.9 | 105.9 | 130.9 |
| 1425880_x_at | Zfp352        | 80.8  | 84.3  | 49.3  | 30.8  | 98.4  | 9.1   | 198.5 | 336.5 | 592.4 | 16.8  | 39.9  | 23.3  |
| 1444496_at   |               | 258.9 | 64.4  | 3.5   | 24.3  | 108.3 | 59.1  | 509.4 | 233.6 | 356   | 70.9  | 40.3  | 62.6  |
| 1435660_at   |               | 279.5 | 227.7 | 220.5 | 324.2 | 137.4 | 319.4 | 464.8 | 716.5 | 673.8 | 244.7 | 258.1 | 123.6 |
| 1425458_a_at | Grb10         | 513.3 | 560.2 | 932.1 | 490.8 | 773.3 | 742   | 1256  | 1642  | 2105  | 476.1 | 771.1 | 699.7 |
| 1425879_at   | Zfp352        | 112.4 | 62.8  | 78.4  | 65.7  | 81.4  | 16.1  | 320.8 | 445.4 | 649.8 | 76.3  | 67.1  | 47.6  |
| 1429413_at   | 5730456K23Rik | 1382  | 231.7 | 198.6 | 1203  | 397.6 | 396.1 | 2379  | 471.6 | 584.1 | 993.2 | 172.8 | 173.4 |
| 1438026_at   | 2310030G09Rik | 2004  | 453.8 | 369.9 | 2354  | 419.9 | 467.7 | 2931  | 1060  | 1204  | 1168  | 449.5 | 247.9 |
| 1448272_at   | Btg2          | 580.9 | 344.4 | 262.6 | 613.7 | 378.9 | 510.3 | 944.4 | 805.9 | 841.6 | 377.1 | 285.7 | 223.4 |
| 1450826_a_at | Saa3          | 1299  | 2331  | 1507  | 455.9 | 1247  | 1093  | 1156  | 4895  | 4231  | 968   | 2225  | 2541  |
| 1459923_at   |               | 21.7  | 48.9  | 6.4   | 42.1  | 42.2  | 58.5  | 33.8  | 159.7 | 115.3 | 22.1  | 64.3  | 7.9   |
| 1451751_at   | 1700037B15Rik | 165.8 | 184.4 | 146   | 181.8 | 220.7 | 234.9 | 447   | 607.6 | 1172  | 179.2 | 128.9 | 132.8 |
| 1456493_at   | 5830484A20Rik | 384   | 239.1 | 312   | 336.1 | 391.1 | 517.6 | 464.9 | 661.5 | 1105  | 261.7 | 323.9 | 313   |
| 1447963_at   |               | 29.3  | 32.5  | 2     | 14.6  | 18    | 33.7  | 37    | 125.3 | 245.2 | 25.7  | 2.6   | 3.1   |
| 1449540_at   | Psx2          | 23.6  | 151.5 | 98.6  | 12.2  | 82.1  | 179.1 | 19    | 268   | 351.4 | 45.4  | 43.5  | 105.7 |
| 1449253_at   | Smc1l2        | 6.7   | 17.9  | 51.7  | 7.1   | 21.1  | 5.5   | 21    | 137.7 | 208.8 | 6.6   | 10.7  | 3.3   |
| 1416776_at   | Crym          | 72.8  | 82.3  | 102.6 | 18.2  | 76.9  | 64.7  | 104.9 | 355.4 | 202.1 | 132.1 | 189.7 | 134.1 |
| 1425160_at   |               | 86.6  | 109.9 | 135.8 | 54    | 65.9  | 105.7 | 182.1 | 435.5 | 541.3 | 41.6  | 112.1 | 136.3 |
| 1452405_x_at | A430107P09Rik | 121.4 | 74.5  | 72.1  | 21.8  | 148.8 | 166.6 | 187   | 255.6 | 356   | 76.3  | 106.3 | 98.2  |
| 1423672_at   | 2510042P03Rik | 68.7  | 103.8 | 114.4 | 63.6  | 166.8 | 110.9 | 64.4  | 308.3 | 607.2 | 71.6  | 102.3 | 141.2 |
| 1450869_at   | Fgf1          | 130.7 | 26.9  | 66.9  | 99.8  | 54.6  | 97    | 177.4 | 165.8 | 211.4 | 111.1 | 38    | 36.3  |
| 1435906_x_at | Gbp2          | 30.3  | 30.7  | 8.3   | 21.6  | 24.3  | 19.1  | 44.9  | 98.3  | 77.7  | 28    | 53.6  | 15    |
| 1427005_at   | Snk           | 89.4  | 74.2  | 74    | 67.7  | 75.8  | 158.8 | 347.7 | 484.1 | 570.9 | 38.6  | 64.4  | 20.7  |
| 1427115_at   | Myh3          | 8     | 40.2  | 41.1  | 16.3  | 66.4  | 41.2  | 4.7   | 67.4  | 195.2 | 25.8  | 48.6  | 71.3  |
| 1450653_at   | Spz1-pending  | 8.5   | 71.8  | 32.8  | 22.7  | 79.5  | 8.1   | 77.4  | 196.4 | 238.3 | 14.5  | 36.2  | 3.2   |
| 1435642_at   | 9630019K15Rik | 77.6  | 60.4  | 9.2   | 461   | 74.9  | 85.5  | 494.8 | 163.5 | 223.9 | 76.9  | 55.3  | 75.4  |

|              |                |       |       |       |       |       |       |       |       |       |       |       |       |
|--------------|----------------|-------|-------|-------|-------|-------|-------|-------|-------|-------|-------|-------|-------|
| 1424536_at   | Oas1e          | 502.7 | 8.8   | 8.2   | 175.8 | 60.1  | 121.2 | 217.5 | 159.5 | 258.6 | 194.8 | 66.9  | 113.5 |
| 1420729_at   | Tcstv1-pending | 19.1  | 50.9  | 15.6  | 28.6  | 74.7  | 53.4  | 102.1 | 242.5 | 374.7 | 23.2  | 22    | 6.8   |
| 1457033_at   |                | 266.2 | 184.8 | 60.3  | 226.7 | 42.7  | 96    | 8788  | 1395  | 3205  | 331.2 | 144.6 | 84.4  |
| 1416847_s_at | Oas1d          | 18    | 37    | 69.4  | 88.7  | 64.6  | 136.3 | 70    | 198.7 | 177.4 | 29.6  | 76.8  | 9.8   |
| 1425220_x_at |                | 15.7  | 148.2 | 8.5   | 13.7  | 139.7 | 118   | 653.7 | 1137  | 2431  | 8.3   | 180.7 | 8.3   |
| 1453331_at   | 1700013H16Rik  | 290.7 | 152.9 | 98.8  | 255.1 | 72.7  | 97.1  | 749.7 | 288.5 | 436.2 | 289.1 | 166.5 | 201.2 |
| 1439771_s_at |                | 202   | 49.7  | 71.3  | 137.9 | 113.9 | 115.2 | 692.2 | 665.8 | 683.4 | 107.7 | 57.6  | 116   |
| 1458564_at   |                | 243.5 | 96.9  | 71.3  | 309.5 | 85.6  | 93.3  | 2097  | 777.4 | 986   | 168.6 | 31.1  | 113.1 |
| 1455088_at   |                | 279.7 | 72.9  | 131.3 | 386   | 75.4  | 23.4  | 1174  | 279.1 | 740.3 | 105.2 | 112.9 | 71    |
| 1457407_at   |                | 73.3  | 62.9  | 37.2  | 144.4 | 67.3  | 17.5  | 881.5 | 190.9 | 451.7 | 267.8 | 44.8  | 76.2  |
| 1418550_x_at | Defcr-rs1      | 102.2 | 218.8 | 297.8 | 211.4 | 298.8 | 367   | 352.3 | 849.2 | 585.9 | 215.4 | 259.5 | 332.8 |
| 1451852_at   | LOC236219      | 7.4   | 3.2   | 14.5  | 20.9  | 20.6  | 2.6   | 127.3 | 130.9 | 341.7 | 14.4  | 41.8  | 3.4   |
| 1444142_at   |                | 127.2 | 41.8  | 8.9   | 508.8 | 70.9  | 84.2  | 1550  | 270.2 | 874.9 | 143.8 | 135.2 | 46.9  |
| 1425427_at   |                | 3.9   | 150.7 | 3.5   | 3.1   | 82.6  | 41    | 102.7 | 544.8 | 938.9 | 2.8   | 7.9   | 107.6 |
| 1442334_at   |                | 333.7 | 105.1 | 37.4  | 323.1 | 19.3  | 67.6  | 5331  | 721.2 | 2099  | 344.9 | 132.6 | 61.3  |

group 4

| Probe Set    | Common name   | wt 1  | wt 2  | wt 3  | SB 1  | SB 2  | SB 3  | SP 1  | SP 2  | SP 3  | U 1   | U 2   | U 3   |
|--------------|---------------|-------|-------|-------|-------|-------|-------|-------|-------|-------|-------|-------|-------|
| 1436970_a_at | Pdgfrb        | 58.4  | 133.5 | 104.6 | 17    | 20.1  | 66.3  | 11.4  | 35.3  | 20.7  | 33.5  | 111.9 | 2.8   |
| 1438558_x_at | Foxq1         | 948.3 | 1035  | 1114  | 260.5 | 286.9 | 545.1 | 150.3 | 306.1 | 264.4 | 526.3 | 608.6 | 907.6 |
| 1422804_at   | Spi12         | 507.1 | 798.7 | 1059  | 171.5 | 216.2 | 514.8 | 234.9 | 321.4 | 478.5 | 384.3 | 1028  | 434.9 |
| 1422735_at   | Foxq1         | 764.3 | 301.8 | 198.7 | 270.7 | 123.7 | 169.9 | 211.6 | 136.6 | 154.9 | 465.7 | 264.9 | 222   |
| 1429338_a_at | 4632412I24Rik | 387.2 | 149.7 | 273.4 | 98.9  | 186   | 110.5 | 158.3 | 189.9 | 129   | 194.7 | 47.8  | 267.8 |
| 1420360_at   | Dkk1          | 855.3 | 1482  | 1371  | 332.5 | 592.8 | 662   | 359.3 | 571.4 | 553.2 | 391   | 356.5 | 1117  |
| 1416564_at   | Sox7          | 329.3 | 401.3 | 602.1 | 100.9 | 252   | 258   | 98.7  | 210.1 | 188.4 | 162.8 | 275.6 | 451.1 |
| 1450646_at   | Cyp51         | 634.4 | 1896  | 2425  | 294.1 | 913.4 | 917.6 | 356.4 | 973.9 | 1025  | 804.4 | 1882  | 1555  |
| 1458232_at   | Dkk1          | 1643  | 475.7 | 564.6 | 381.7 | 120.8 | 170.9 | 251.6 | 122   | 184.5 | 498.8 | 229.4 | 336.9 |
| 1449582_at   | Cdx1          | 261.9 | 518.3 | 305   | 41.4  | 113.2 | 79.7  | 47.2  | 146.5 | 80.2  | 355.6 | 334.9 | 317.6 |

group 5

| Probe Set    | Common name   | wt 1  | wt 2  | wt 3  | SB 1  | SB 2  | SB 3  | SP 1  | SP 2  | SP 3  | U 1   | U 2   | U 3   |
|--------------|---------------|-------|-------|-------|-------|-------|-------|-------|-------|-------|-------|-------|-------|
| 1437893_at   | MGC40917      | 861.8 | 181.8 | 280.2 | 871.6 | 65.7  | 126.1 | 1352  | 215.7 | 156   | 812.3 | 103.5 | 177.5 |
| 1430051_at   | 4930486L24Rik | 3395  | 1105  | 1056  | 1311  | 474.2 | 504.5 | 1977  | 737.9 | 594.2 | 2151  | 1178  | 1317  |
| 1416488_at   | Ccng2         | 383.4 | 1253  | 1218  | 244.9 | 446   | 422.3 | 579.7 | 2317  | 1936  | 344.1 | 855.5 | 1216  |
| 1422293_a_at | 4933402K10Rik | 257.8 | 349.2 | 442.9 | 189   | 192   | 183.4 | 172.2 | 192.4 | 368.7 | 299.6 | 474   | 463.9 |
| 1430781_at   | 4930502N02Rik | 6325  | 2163  | 1921  | 4271  | 415.7 | 349.4 | 8594  | 2402  | 2219  | 6083  | 1424  | 1979  |
| 1435992_at   |               | 362.7 | 154.4 | 172.6 | 388   | 58.2  | 48.4  | 601.8 | 114.9 | 85.4  | 573.8 | 76.8  | 97.2  |
| 1433768_at   | 2410003B16Rik | 1533  | 544.8 | 749.4 | 817.7 | 259.2 | 110.1 | 1223  | 407.5 | 496.5 | 990.6 | 599.7 | 467.8 |
| 1442040_at   |               | 635.5 | 269.8 | 239   | 182.9 | 112.8 | 74.6  | 364.2 | 133.5 | 137.6 | 322.7 | 225.4 | 122.6 |
| 1447655_x_at | Sox6          | 1137  | 398.4 | 450.9 | 487.4 | 173.8 | 193.1 | 874.9 | 376.3 | 223.4 | 742.8 | 493.7 | 329.1 |
| 1448606_at   | Edg2          | 739.5 | 852.8 | 861.5 | 280.7 | 536.8 | 476.1 | 485   | 707   | 655.7 | 507.8 | 729.5 | 1201  |
| 1438322_x_at | Fdft1         | 1922  | 8217  | 8923  | 896.1 | 3943  | 4312  | 1042  | 4805  | 5503  | 2001  | 6570  | 6909  |
| 1417597_at   | Cd28          | 68.6  | 162.2 | 156.3 | 41.5  | 40.9  | 39.1  | 58.4  | 75.6  | 105.9 | 63.5  | 174.4 | 186.4 |
| 1437434_a_at | 5031439A09Rik | 586   | 793.4 | 773.8 | 288.4 | 196.9 | 301.4 | 402.6 | 646.8 | 659.3 | 603.4 | 635.9 | 665   |
| 1428663_at   | 5133401H06Rik | 529   | 427.6 | 337.6 | 178.3 | 107.9 | 74.7  | 323.1 | 374.7 | 499.5 | 259.6 | 127.3 | 390.1 |
| 1451760_s_at | AI317395      | 243.9 | 225.5 | 200.8 | 170.5 | 56.4  | 54.4  | 199.6 | 190.6 | 218.2 | 121.8 | 141.9 | 234.7 |
| 1457377_at   |               | 307   | 141.3 | 171.8 | 33.1  | 19.3  | 38.2  | 291.4 | 143.3 | 68.4  | 75.5  | 56.3  | 72.7  |
| 1434436_at   | 5630401M14Rik | 82.8  | 136.5 | 197.5 | 63.2  | 67.8  | 38.3  | 80.6  | 106.4 | 144.8 | 30    | 63.6  | 77.6  |
| 1419554_at   | B430305P08Rik | 125.6 | 395.5 | 400.6 | 100.3 | 186.8 | 209.2 | 87.5  | 163.8 | 353.6 | 162.7 | 314.2 | 193.5 |
| 1434369_a_at | Cryab         | 826.3 | 2917  | 3122  | 286.3 | 997.7 | 1200  | 481.9 | 1795  | 1821  | 341   | 1597  | 2523  |
| 1416895_at   | Efnal         | 145.5 | 267.2 | 266.9 | 53.2  | 82.4  | 93.9  | 116.1 | 283.7 | 167.9 | 227.6 | 376.7 | 377.6 |
| 1423824_at   | 5031439A09Rik | 231.2 | 763.7 | 656.5 | 131.6 | 328.4 | 297.9 | 204.1 | 571.2 | 828.2 | 336.7 | 605.3 | 496.4 |
| 1438704_at   |               | 153.5 | 68.3  | 70.6  | 26.7  | 16.6  | 5.9   | 17.5  | 56.8  | 32.6  | 37.6  | 2.5   | 47.4  |
| 1452387_a_at | Amotl2        | 1045  | 1668  | 1599  | 348.3 | 705.2 | 966.1 | 783   | 1144  | 1085  | 601.3 | 861.5 | 1613  |
| 1442918_at   |               | 1187  | 377.3 | 262.5 | 414.1 | 142   | 135   | 508.5 | 235.2 | 230.1 | 854   | 204.2 | 206.3 |
| 1436931_at   | Rfx4          | 2330  | 710.4 | 989.9 | 425.2 | 245.8 | 311.2 | 2465  | 966.4 | 810.9 | 988.6 | 444.5 | 427.5 |
| 1456144_at   |               | 2125  | 782.4 | 597   | 1148  | 274.9 | 376.4 | 1777  | 476.4 | 444.9 | 1651  | 457   | 653.1 |
| 1435831_at   | Upk1b         | 1069  | 323.1 | 519.7 | 360.3 | 123   | 89.4  | 653.7 | 226.5 | 158.2 | 431.6 | 186.7 | 162.9 |
| 1434815_a_at |               | 4506  | 899.3 | 567.2 | 1400  | 233.3 | 280.4 | 3861  | 1127  | 902.3 | 2946  | 348.4 | 457.3 |
| 1419775_at   |               | 219.8 | 295.1 | 397.4 | 76.5  | 278.4 | 116.2 | 159.2 | 339.1 | 202.2 | 209   | 89.4  | 197.7 |
| 1460330_at   | Anxa3         | 886.7 | 899.9 | 896.7 | 386.3 | 563.8 | 363.7 | 484.8 | 503.7 | 523   | 508.6 | 717.2 | 528.7 |
| 1418365_at   | Ctsh          | 435.7 | 756.1 | 702.8 | 149.2 | 398.4 | 324.3 | 259.9 | 376.3 | 304.5 | 200.5 | 526.2 | 644.8 |
| 1445160_at   | 4732483H20Rik | 202.8 | 80.1  | 85.3  | 46.7  | 44.4  | 48.2  | 166   | 43.6  | 113.3 | 84.7  | 51.2  | 35.8  |
| 1434917_at   | cobl          | 1233  | 153.9 | 151.4 | 294.7 | 87.3  | 35.7  | 734.3 | 111.7 | 116   | 2019  | 304   | 141.3 |
| 1433595_at   | C330011J09    | 393.1 | 327.3 | 406.5 | 136.1 | 184.8 | 154.8 | 310.2 | 402.1 | 268.2 | 202.5 | 308   | 314.9 |
| 1429691_at   | 5430405N12Rik | 243.1 | 510.3 | 224.6 | 160.5 | 120.8 | 49.9  | 273.2 | 228.3 | 207.4 | 208.8 | 156.5 | 182.7 |
| 1441667_s_at | 4632404M21Rik | 1079  | 217   | 362.2 | 264.3 | 94    | 92.1  | 551.8 | 271.9 | 271   | 895.2 | 398.6 | 337.3 |
| 1455299_at   |               | 2335  | 878.5 | 995.3 | 1032  | 422.1 | 478.4 | 1953  | 774.9 | 1019  | 1832  | 924.3 | 1335  |
| 1436619_at   |               | 3560  | 988.2 | 1545  | 1809  | 462.8 | 526.7 | 4233  | 1392  | 894.6 | 3000  | 540.2 | 702.3 |
| 1443163_at   | F730005G13    | 8733  | 2254  | 2722  | 2648  | 745   | 677.6 | 7551  | 2736  | 3575  | 5569  | 4000  | 4315  |
| 1449365_at   | Edg8          | 224.3 | 800   | 378.4 | 63    | 216.5 | 127.1 | 171   | 494.2 | 671.4 | 241   | 624.6 | 591.7 |
| 1449385_at   | Hsd17b9       | 751.1 | 2209  | 2166  | 370.4 | 950.3 | 590.7 | 726.9 | 1901  | 1391  | 934.5 | 1915  | 2039  |
| 1439478_at   | Mte1-pending  | 3103  | 1454  | 1341  | 1331  | 553   | 543.7 | 3092  | 1187  | 1226  | 2248  | 1425  | 1721  |
| 1454862_at   | C820004H04Rik | 426.6 | 1287  | 1128  | 123.9 | 471.9 | 458.3 | 315.9 | 952.3 | 857.6 | 279.6 | 726.4 | 550.1 |
| 1419418_a_at | Morc          | 385.4 | 1181  | 821   | 155   | 494.7 | 275.4 | 244   | 743.8 | 785.4 | 590.5 | 1288  | 1284  |
| 1423825_at   | 5031439A09Rik | 250.8 | 435.2 | 355.7 | 124.5 | 127.9 | 95.7  | 173.7 | 248.7 | 550.4 | 173.4 | 328.1 | 320.8 |

|           |       |      |      |      |      |       |       |      |      |      |      |      |      |
|-----------|-------|------|------|------|------|-------|-------|------|------|------|------|------|------|
| 142492_at | Gnpr1 | 1590 | 5104 | 2148 | 5120 | 802.4 | 925.5 | 1285 | 2870 | 2139 | 1045 | 2605 | 2941 |
|-----------|-------|------|------|------|------|-------|-------|------|------|------|------|------|------|

group 6

| Probe Set    | Common name   | wt 1  | wt 2  | wt 3  | SB 1  | SB 2  | SB 3  | SP 1  | SP 2  | SP 3  | U 1   | U 2   | U 3   |
|--------------|---------------|-------|-------|-------|-------|-------|-------|-------|-------|-------|-------|-------|-------|
| 1452381_at   | C530025K05Rik | 211.6 | 420.7 | 454.9 | 234.5 | 355.9 | 516.4 | 144.1 | 127.6 | 160.8 | 302.2 | 212.5 | 326.8 |
| 1453102_at   | 5530600M07Rik | 2557  | 909.7 | 982.1 | 1105  | 671.8 | 732.6 | 595   | 424.2 | 430.1 | 1209  | 555.6 | 909.6 |
| 1454855_at   | Acvrinp1      | 413.2 | 166   | 187   | 480.6 | 144.7 | 223.7 | 280.9 | 78.3  | 78.6  | 507.6 | 197   | 137.3 |
| 1429310_at   | 5530600M07Rik | 1153  | 721.9 | 735   | 844.8 | 468.7 | 629.9 | 473.2 | 142.2 | 264.3 | 730.8 | 298.1 | 451.6 |
| 1418215_at   | Mep1b         | 749.8 | 1129  | 922.7 | 813.1 | 828.6 | 1010  | 617   | 588.2 | 380.8 | 1166  | 1160  | 1325  |
| 1417079_s_at | Lgals2        | 382.4 | 185.2 | 355   | 111.8 | 100.6 | 162.8 | 178.8 | 58.9  | 142   | 124.5 | 208.5 | 180.2 |
| 1418153_at   | Lama1         | 1928  | 2501  | 3224  | 785.4 | 1567  | 2116  | 428   | 904.7 | 1259  | 1212  | 1536  | 2041  |
| 1421113_at   | Pepf-pending  | 279.4 | 379   | 503.1 | 139   | 251.1 | 214.6 | 152.1 | 99.2  | 105   | 231.3 | 521.9 | 369.8 |
| 1419665_a_at | Nupr1         | 222.3 | 950.8 | 935   | 114.9 | 739.1 | 675.6 | 84.3  | 304.4 | 326   | 283.5 | 1479  | 1465  |
| 1420565_at   | Hoxa1         | 183.2 | 387.7 | 322.3 | 107.2 | 168.9 | 188.7 | 86.6  | 119   | 51.5  | 110.4 | 160.5 | 335.9 |
| 1441061_at   |               | 699   | 173.4 | 172.1 | 778.2 | 113.2 | 229.9 | 615.6 | 44.2  | 64.1  | 741.1 | 158.1 | 201.7 |
| 1430977_at   | A930021C24Rik | 768.8 | 485   | 417.8 | 1345  | 381   | 511.5 | 956.6 | 269.6 | 222.2 | 755.5 | 365.2 | 263.9 |
| 1450843_a_at | Serpinh1      | 538.1 | 1006  | 1065  | 258.9 | 733   | 645.6 | 119   | 350.8 | 392.9 | 485   | 601.1 | 491.3 |
| 1448477_at   | C4st2-pending | 133.5 | 170   | 128.5 | 106   | 186.8 | 102.4 | 17    | 48.9  | 27.2  | 100.2 | 18.2  | 94.3  |
| 1416589_at   | Sparc         | 3504  | 3421  | 3305  | 1629  | 2325  | 2620  | 1143  | 1681  | 1490  | 2219  | 1807  | 2272  |
| 1451382_at   | 1810008K03Rik | 487.8 | 597.3 | 622.9 | 238.4 | 414.8 | 398.3 | 190.9 | 193.8 | 198.2 | 219.2 | 283.5 | 590.7 |
| 1455019_x_at | 5630400A09Rik | 3067  | 1954  | 1800  | 1891  | 1002  | 1518  | 816.8 | 874.7 | 596.8 | 2115  | 1112  | 1447  |
| 1437132_x_at | Nedd9         | 74.9  | 217.1 | 342.9 | 21.5  | 71.9  | 254.8 | 2.1   | 37.9  | 65.6  | 75.1  | 100.8 | 331.3 |
| 1448949_at   | Car4          | 550.3 | 787.8 | 1299  | 276.6 | 1172  | 1733  | 187.6 | 389.6 | 494   | 541   | 1402  | 1467  |
| 1438787_at   |               | 7912  | 752.2 | 550.1 | 6028  | 630.5 | 613.4 | 3607  | 681.2 | 339   | 6652  | 770.5 | 604.9 |
| 1438737_at   | Zic3          | 807   | 496.2 | 736.5 | 342.7 | 290.8 | 389.6 | 120.4 | 238.2 | 323.2 | 608.1 | 240.3 | 326.6 |
| 1421917_at   | Pdgfra        | 683.6 | 2548  | 2461  | 1030  | 2501  | 2924  | 323.7 | 1198  | 999.8 | 613.9 | 1609  | 2018  |
| 1429177_x_at | Sox17         | 1388  | 3571  | 3341  | 983.4 | 1543  | 2960  | 503.3 | 1445  | 1235  | 761.1 | 1480  | 2367  |
| 1415822_at   | Scd2          | 3796  | 10174 | 13527 | 2721  | 9950  | 12664 | 1898  | 5758  | 6294  | 5251  | 11407 | 10981 |
| 1415856_at   | Emb           | 402.1 | 413.9 | 511.7 | 218   | 485.9 | 586.6 | 155.4 | 239.9 | 311.1 | 256.9 | 250.3 | 326.5 |
| 1452035_at   | Col4a1        | 2496  | 3880  | 3283  | 1535  | 2284  | 3062  | 897.6 | 1539  | 1425  | 1446  | 2201  | 3300  |
| 1456733_x_at | Serpinh1      | 948.4 | 1838  | 1479  | 803.7 | 947.1 | 929.9 | 551.7 | 362.1 | 560.4 | 757.8 | 663.1 | 897.2 |
| 1424051_at   | Col4a2        | 1107  | 1110  | 982.7 | 630.2 | 662   | 691.2 | 386.9 | 350   | 396.1 | 746.4 | 671.9 | 894.8 |
| 1417828_at   | Aqp8          | 1092  | 1977  | 2052  | 730.9 | 1754  | 1811  | 300.4 | 755.6 | 914.6 | 887.1 | 2113  | 2012  |
| 1418094_s_at | Car4          | 975.1 | 832.5 | 1085  | 556.8 | 1022  | 1403  | 192.1 | 419.2 | 329.4 | 1124  | 1363  | 1433  |
